# Supplementary material for: α-Glucosidase inhibitory activities of flavonoid derivatives isolated from Bouea macrophylla: in vitro and in silico studies
Source: Royal Society of Chemistry journal article supplement (doi:10.1039/d3ra00650f), 2023-01-01
Supplement: d3ra00650f1.pdf [file d3ra00650f1.pdf]

### Appendix A. Supplementary data

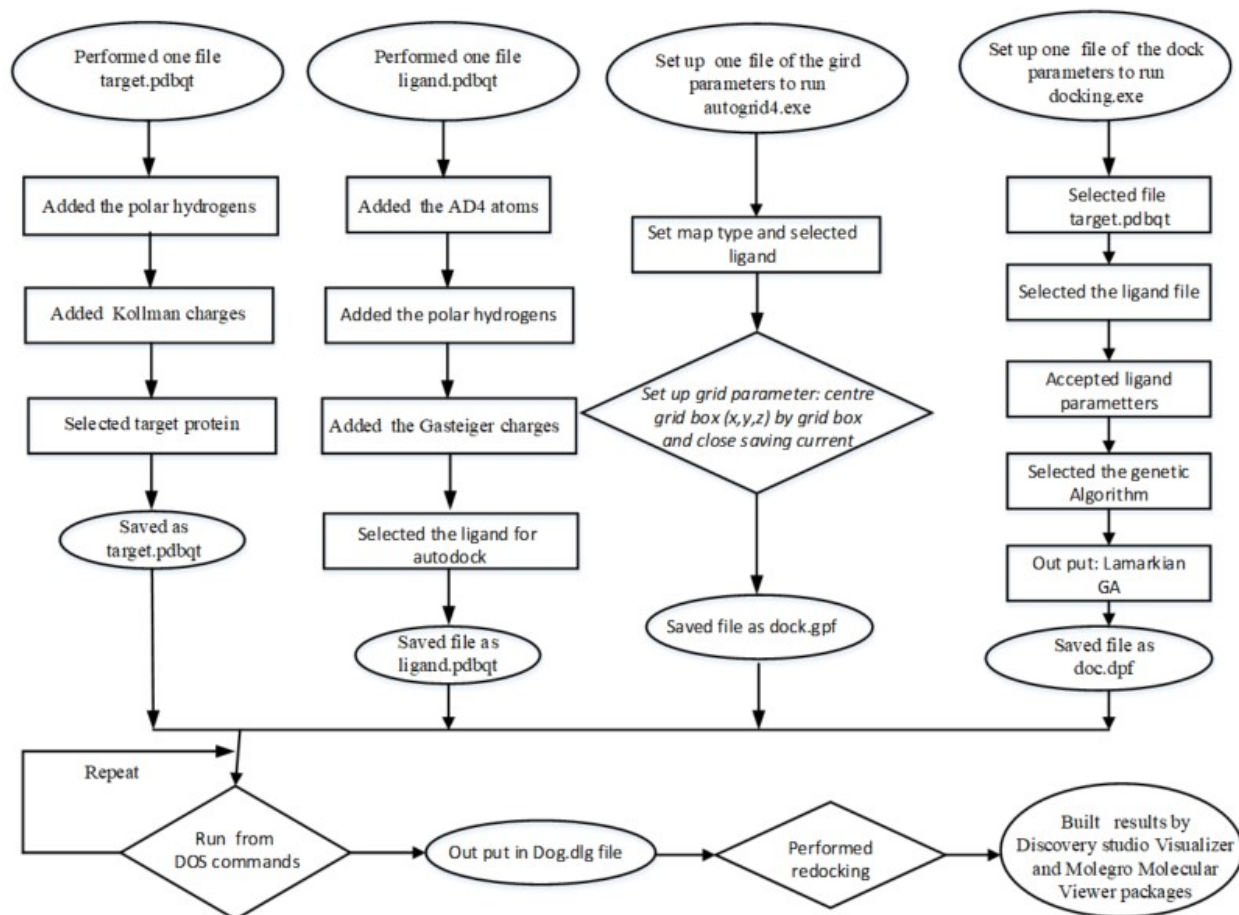

**Scheme S1.** The general procedure for docking of ligand to enzyme or macro protein performed by Autodock tools (ADT) and built model by DSC and Molegro Molecular Viewer (MMV).

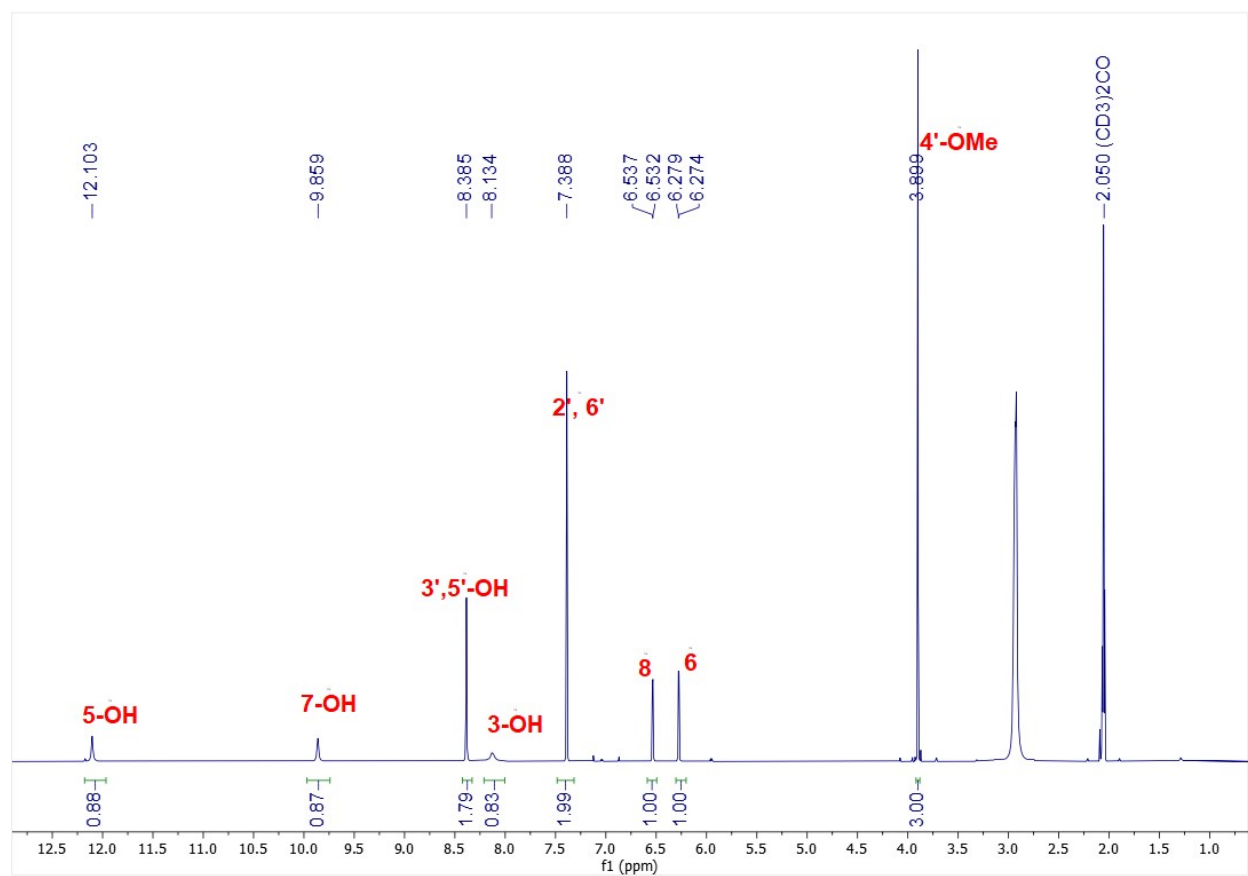

Figure S1. <sup>1</sup>H NMR spectrum (acetone-*d*<sub>6</sub>) of **1**

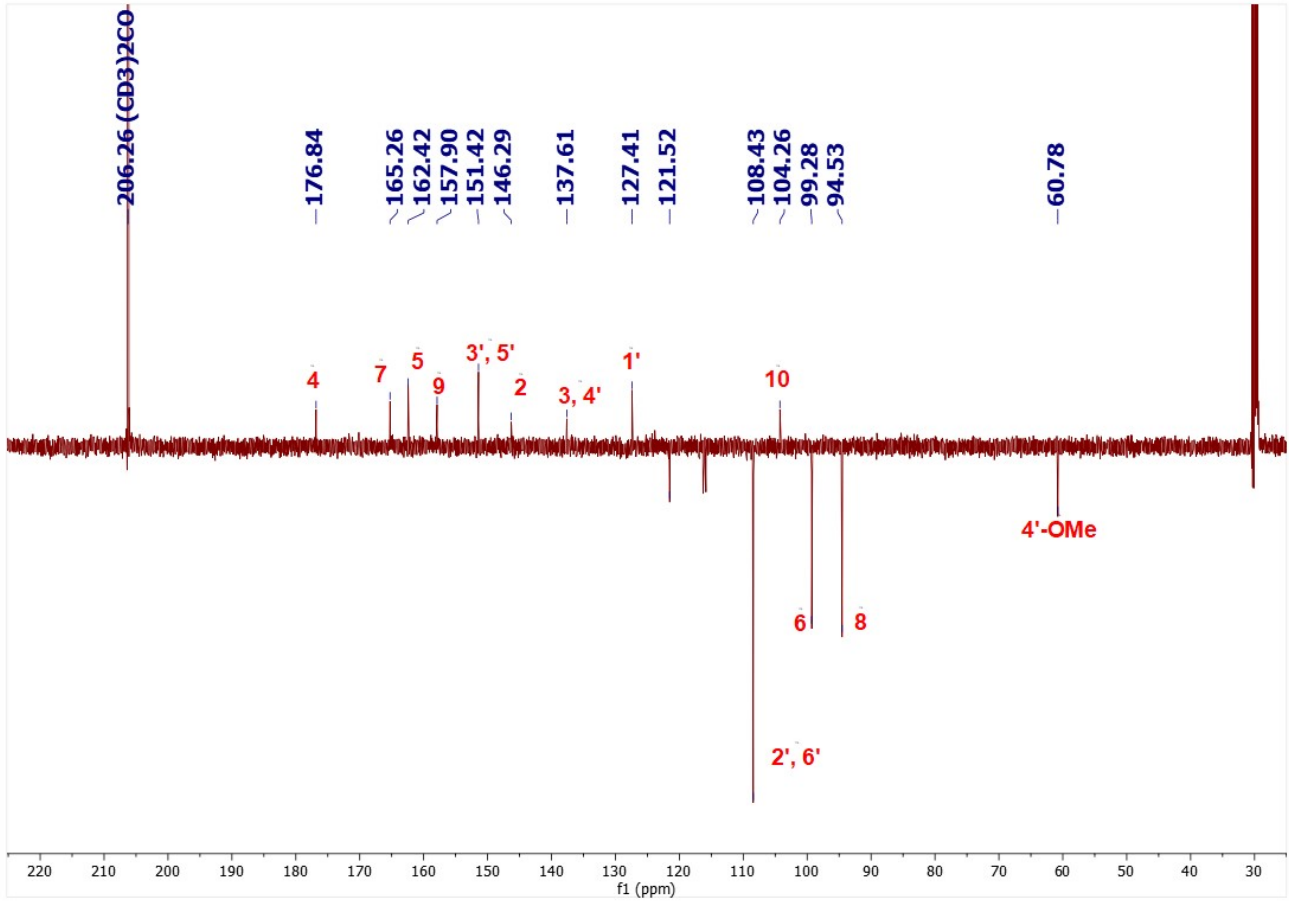

Figure S2. <sup>13</sup>C NMR spectrum (acetone-*d*<sub>6</sub>) of 1

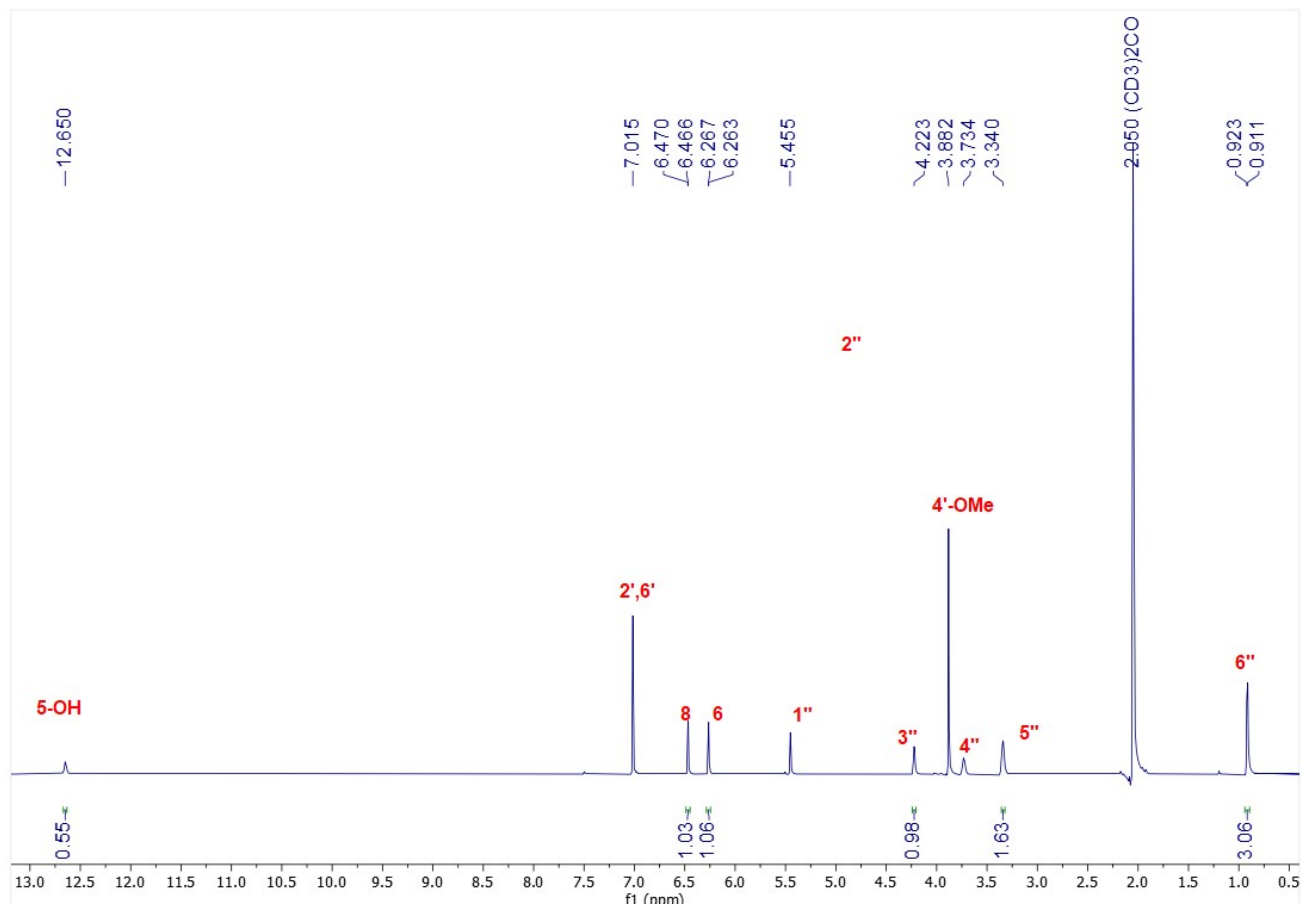

Figure S3.  $^1\text{H}$  NMR spectrum (acetone- $d_6$ ) of **2**

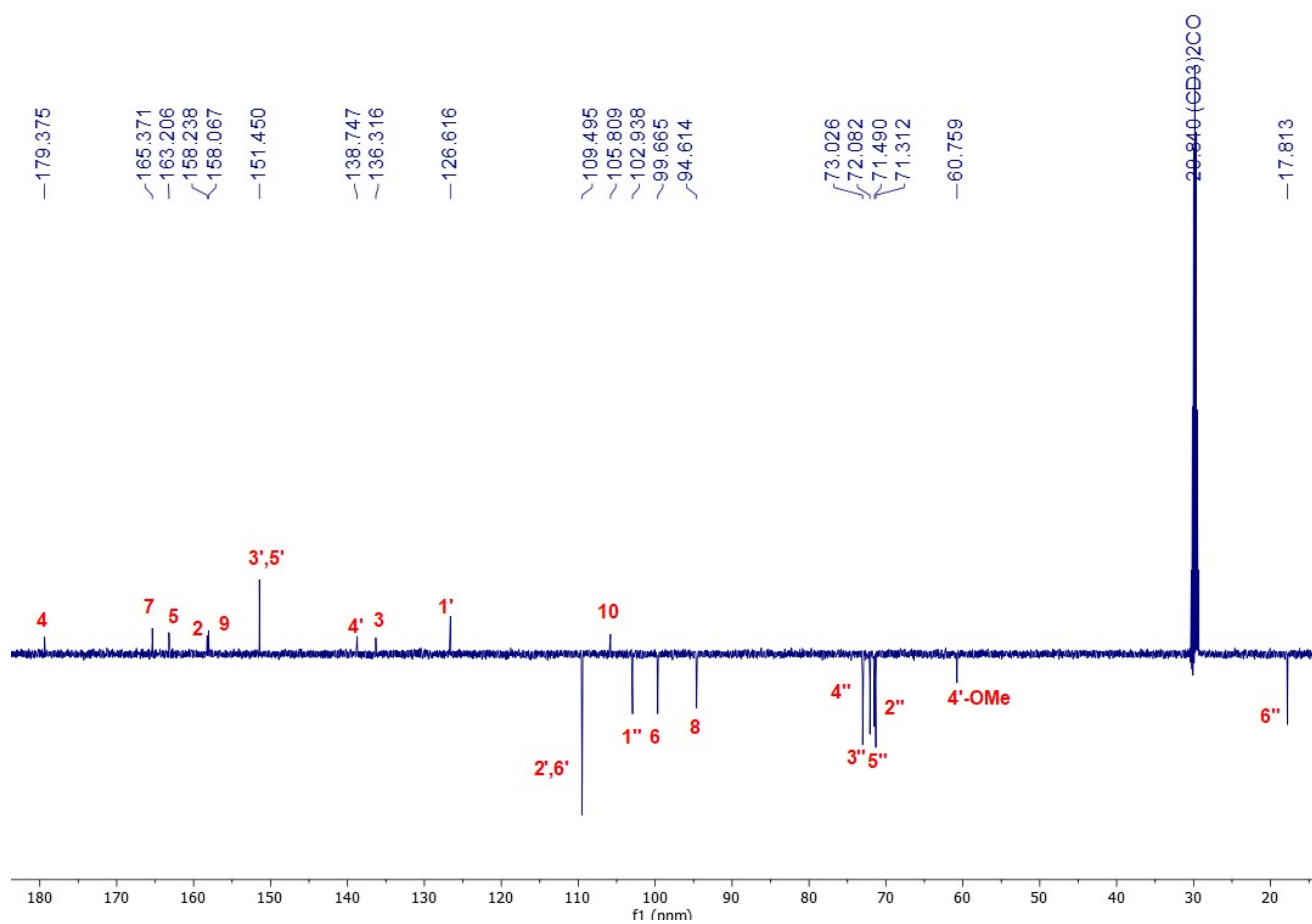

Figure S4. <sup>13</sup>C NMR spectrum (acetone-*d*<sub>6</sub>) of **2**

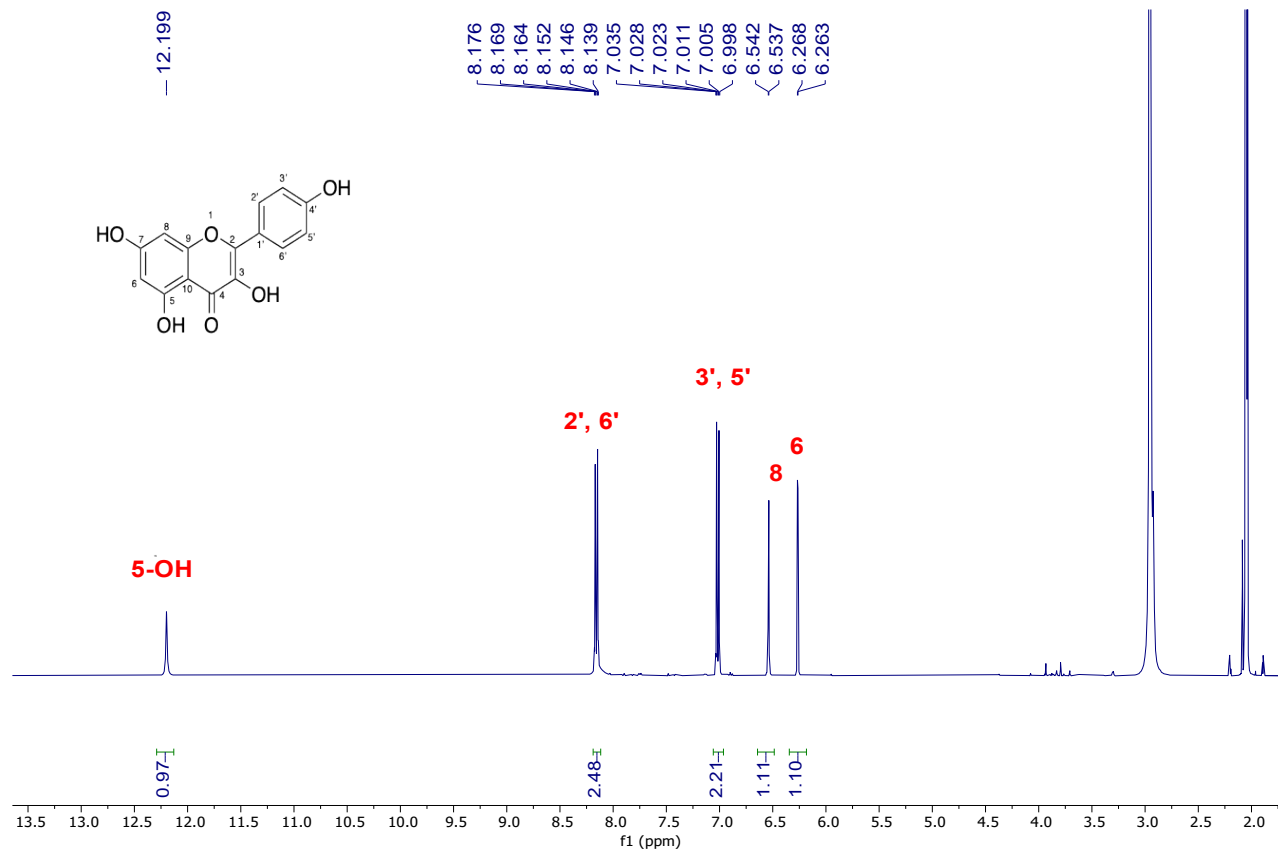

**Figure S5.** <sup>1</sup>H NMR spectrum (acetone-*d*<sub>6</sub>) of **3**

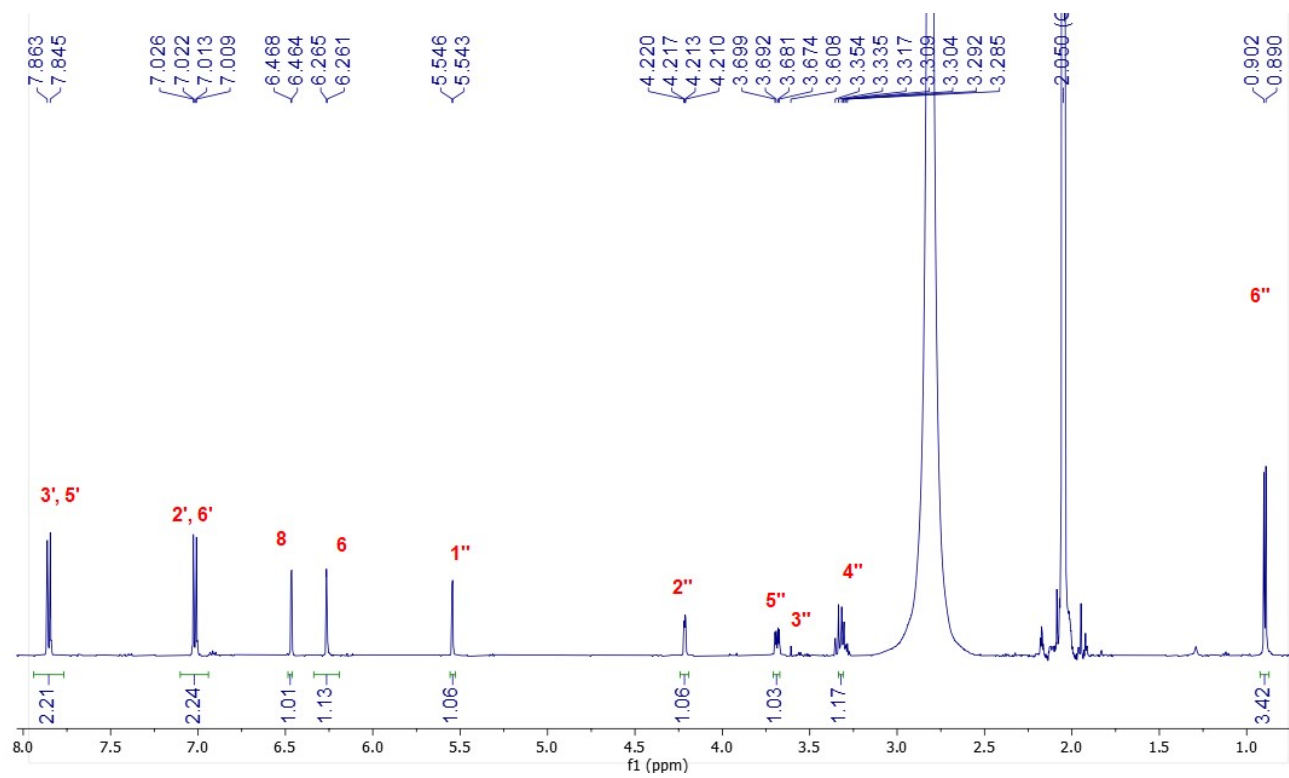

**Figure S6.**  $^1\text{H}$  NMR spectrum (acetone- $d_6$ ) of **4**

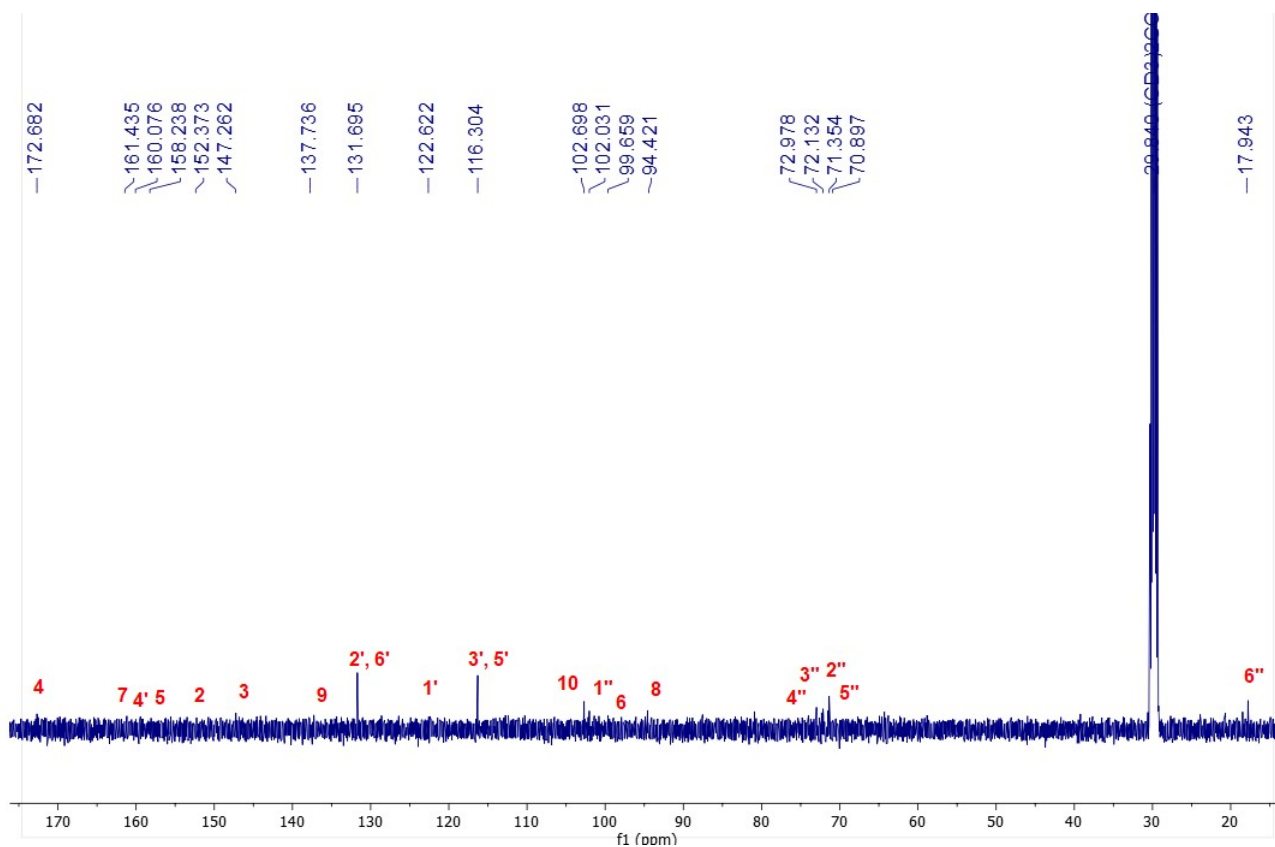

**Figure S7.**  $^{13}\text{C}$  NMR spectrum (acetone- $d_6$ ) of **4**



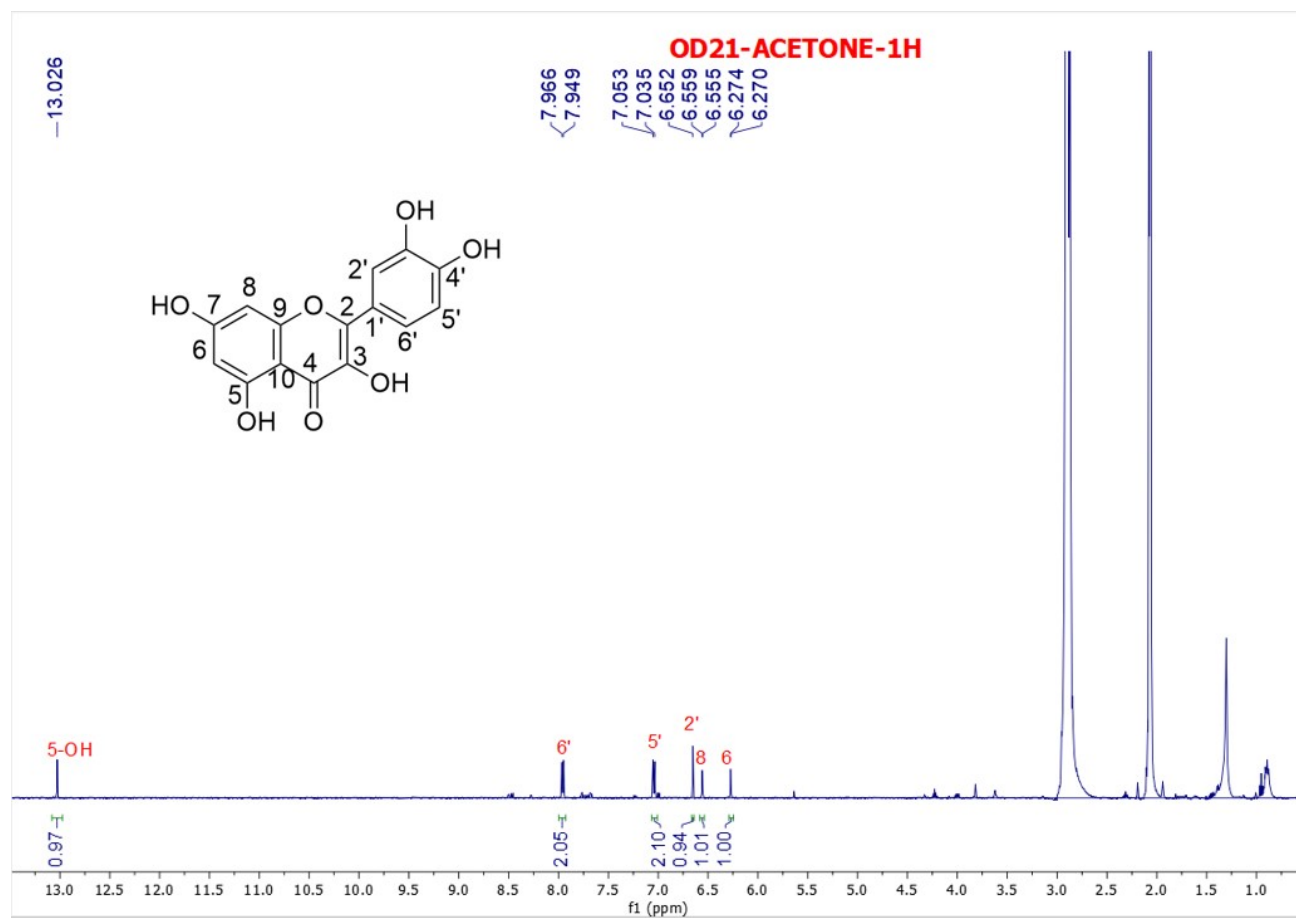

Figure S8.  $^1\text{H}$  NMR spectrum (acetone- $d_6$ ) of **5**

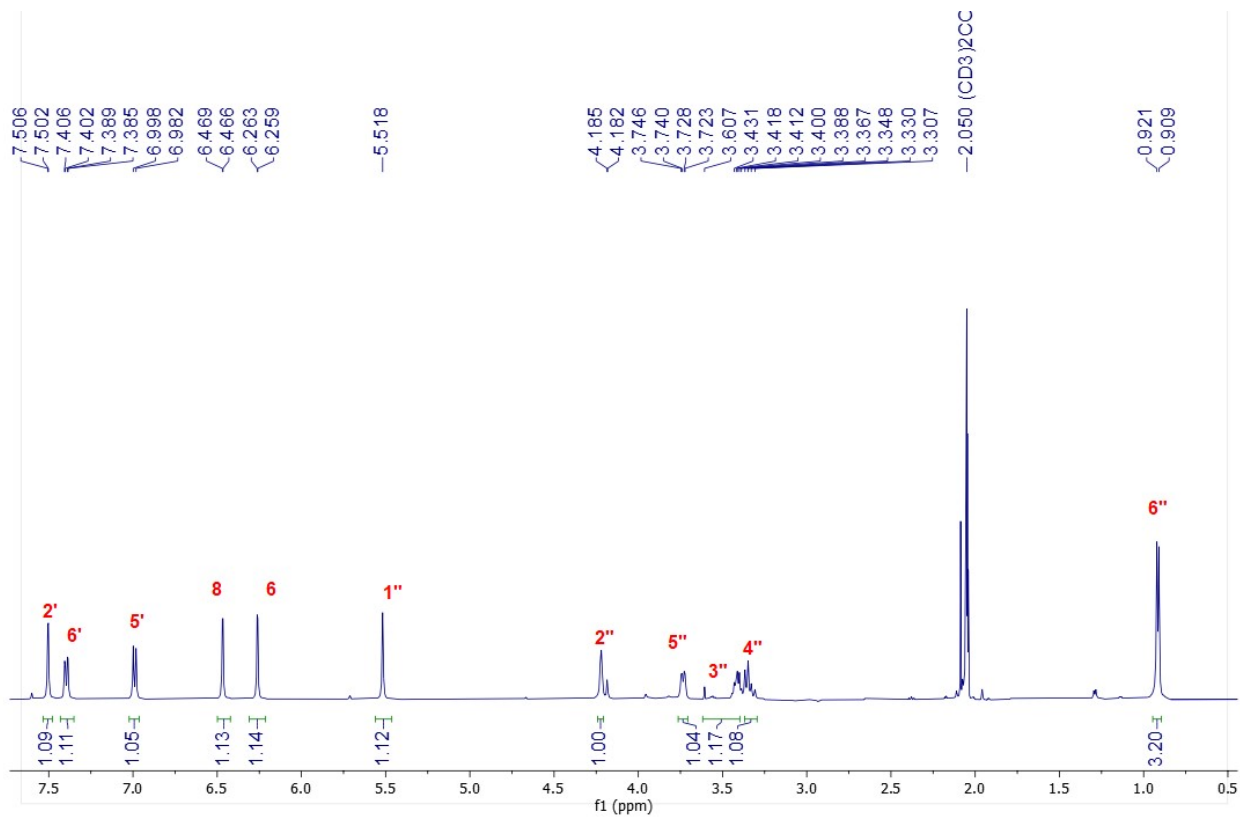

Figure S9. <sup>1</sup>H NMR spectrum (acetone-*d*<sub>6</sub>) of **6**

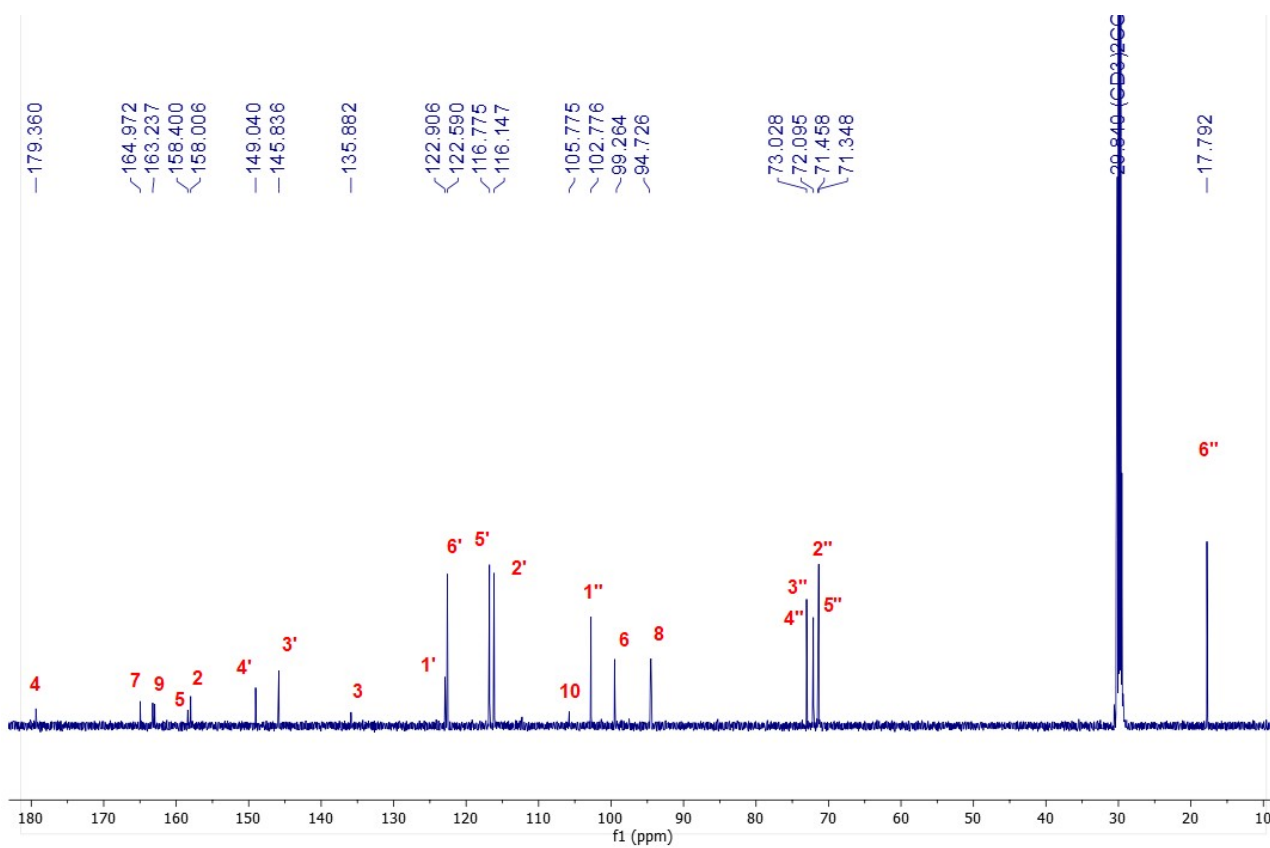

Figure S10. <sup>13</sup>C NMR spectrum (acetone-*d*<sub>6</sub>) of **6**

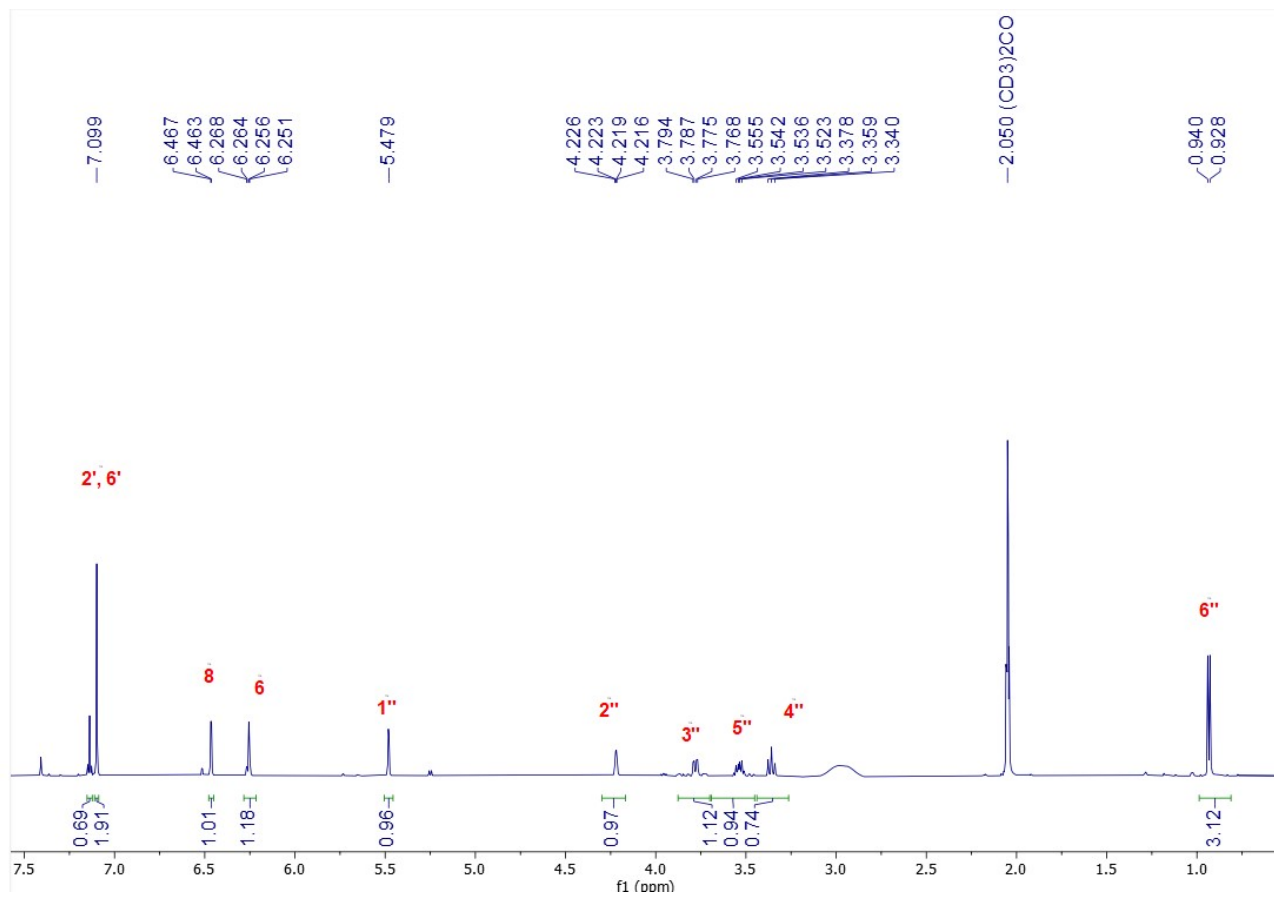

Figure S11. <sup>1</sup>H NMR spectrum (acetone-*d*<sub>6</sub>) of **7**

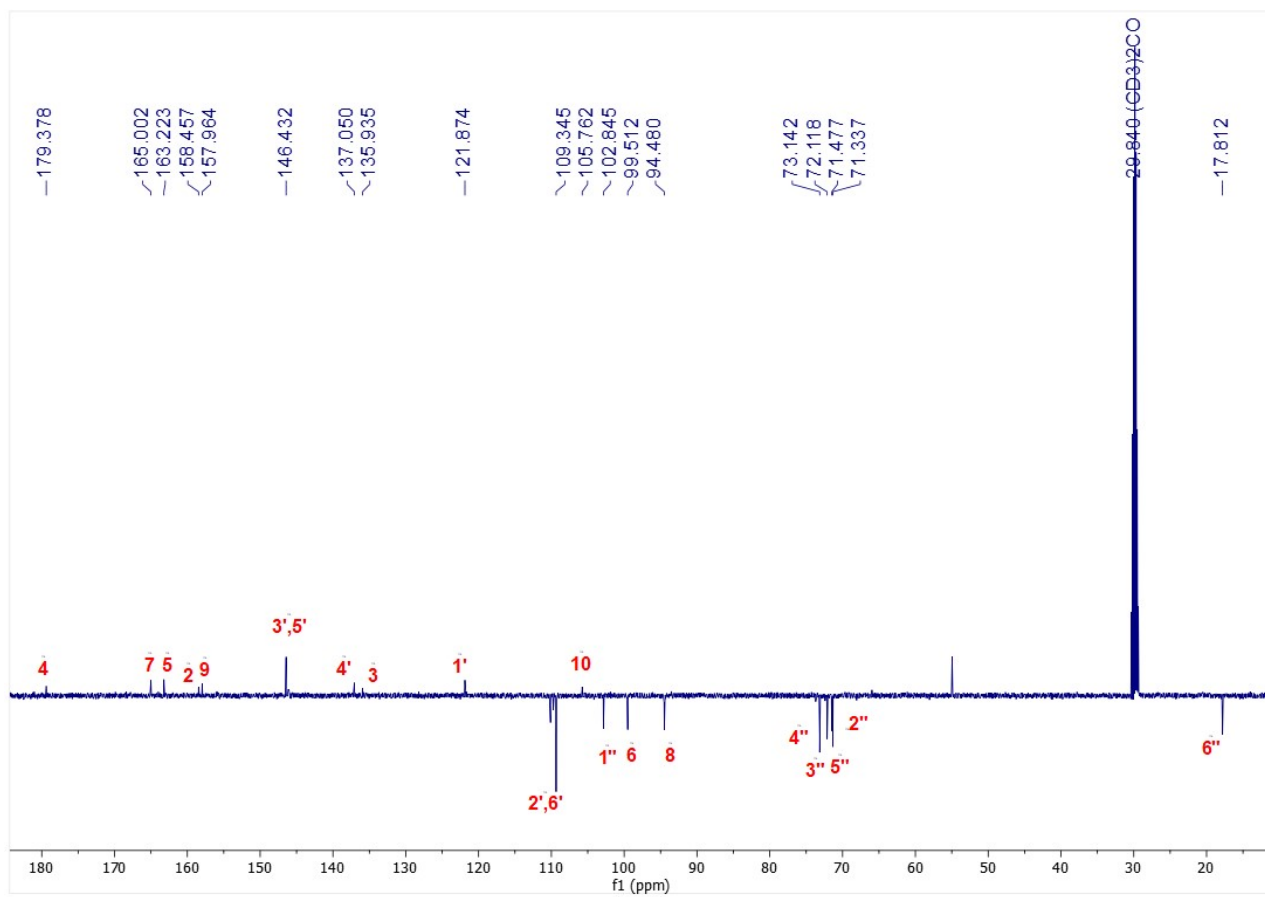

**Figure S12.**  $^{13}\text{C}$  NMR spectrum (acetone- $d_6$ ) of **7**

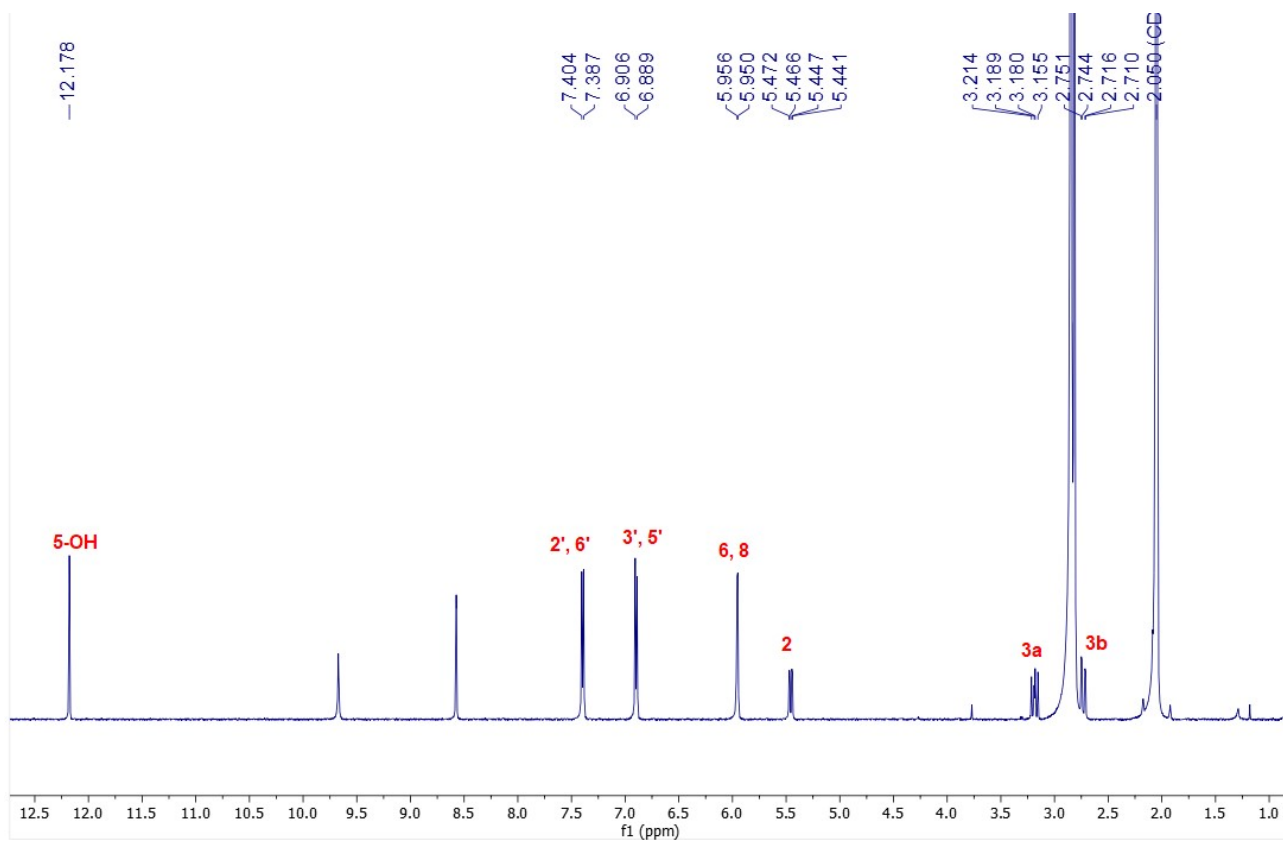

Figure S13.  $^1\text{H}$  NMR spectrum (acetone- $d_6$ ) of **8**

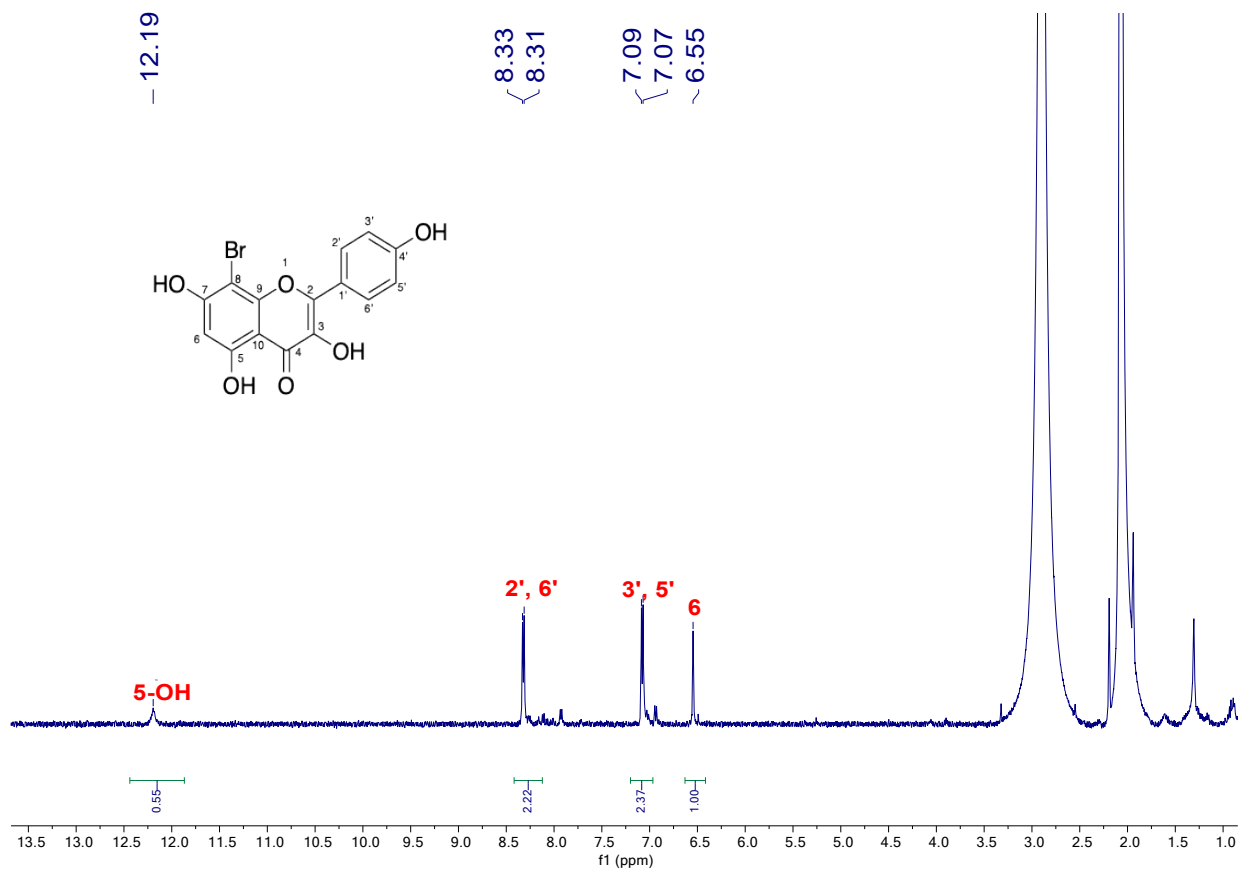

**Figure S14.** <sup>1</sup>H NMR spectrum (acetone-*d*<sub>6</sub>) of **3a**

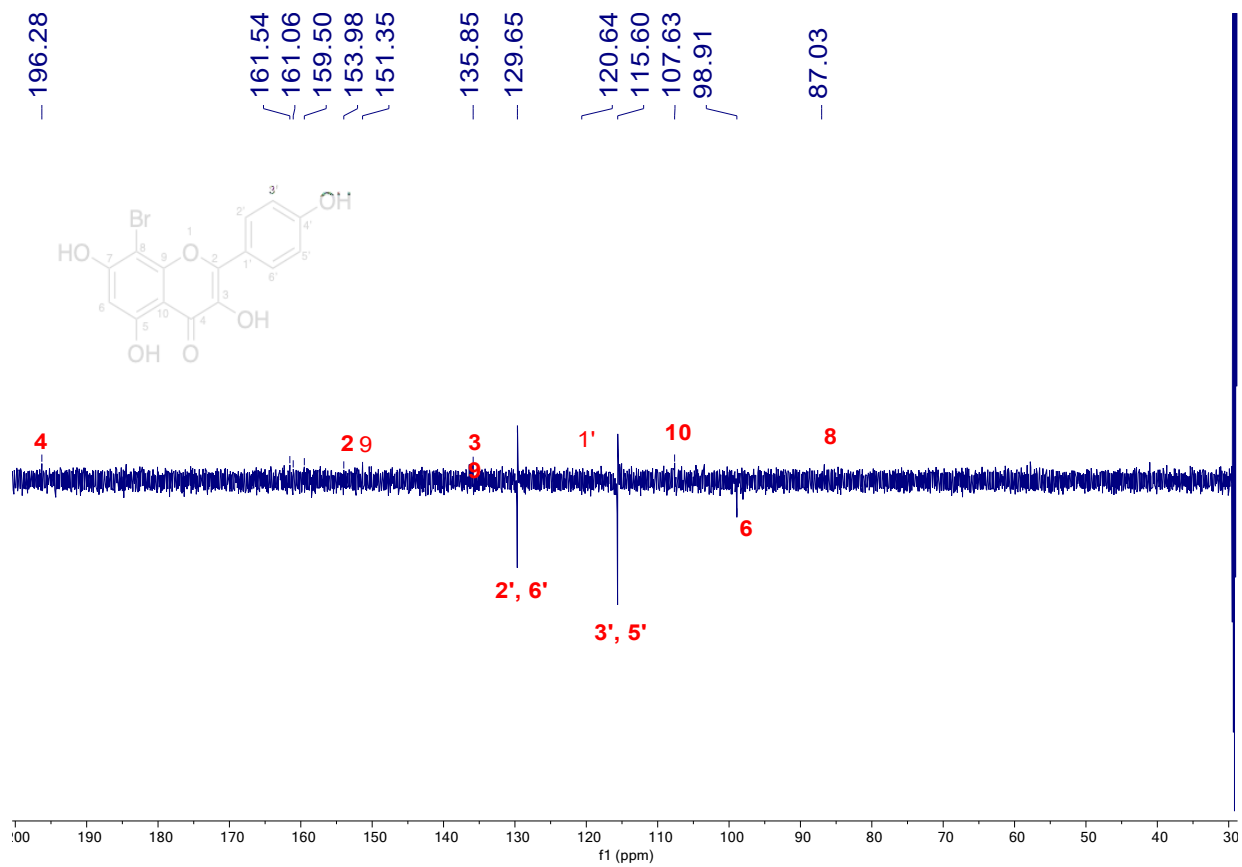

**Figure S15.**  $^{13}\text{C}$  NMR spectrum (acetone- $d_6$ ) of **3a**



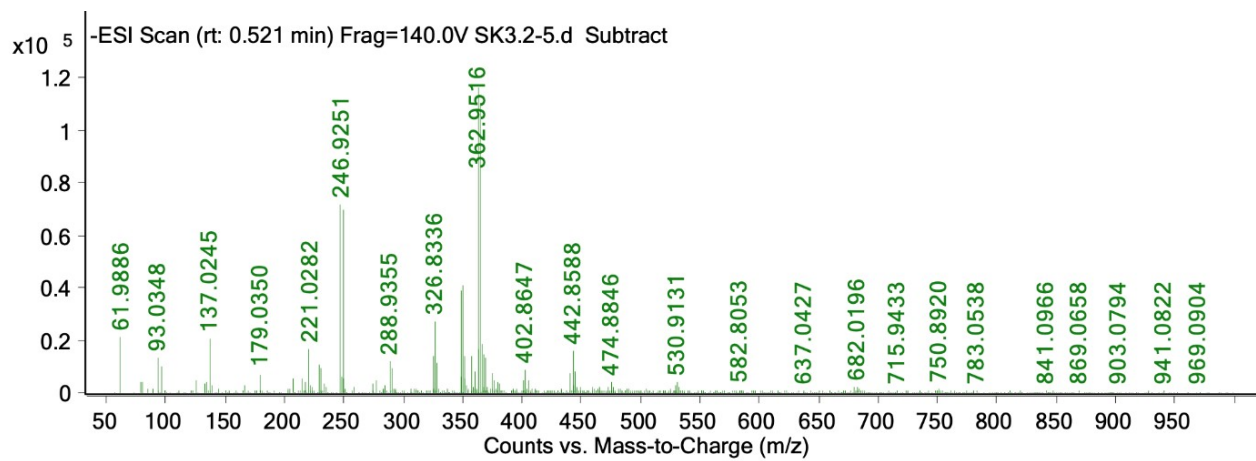

**Figure S16.** HRESIMS spectrum of **3a**

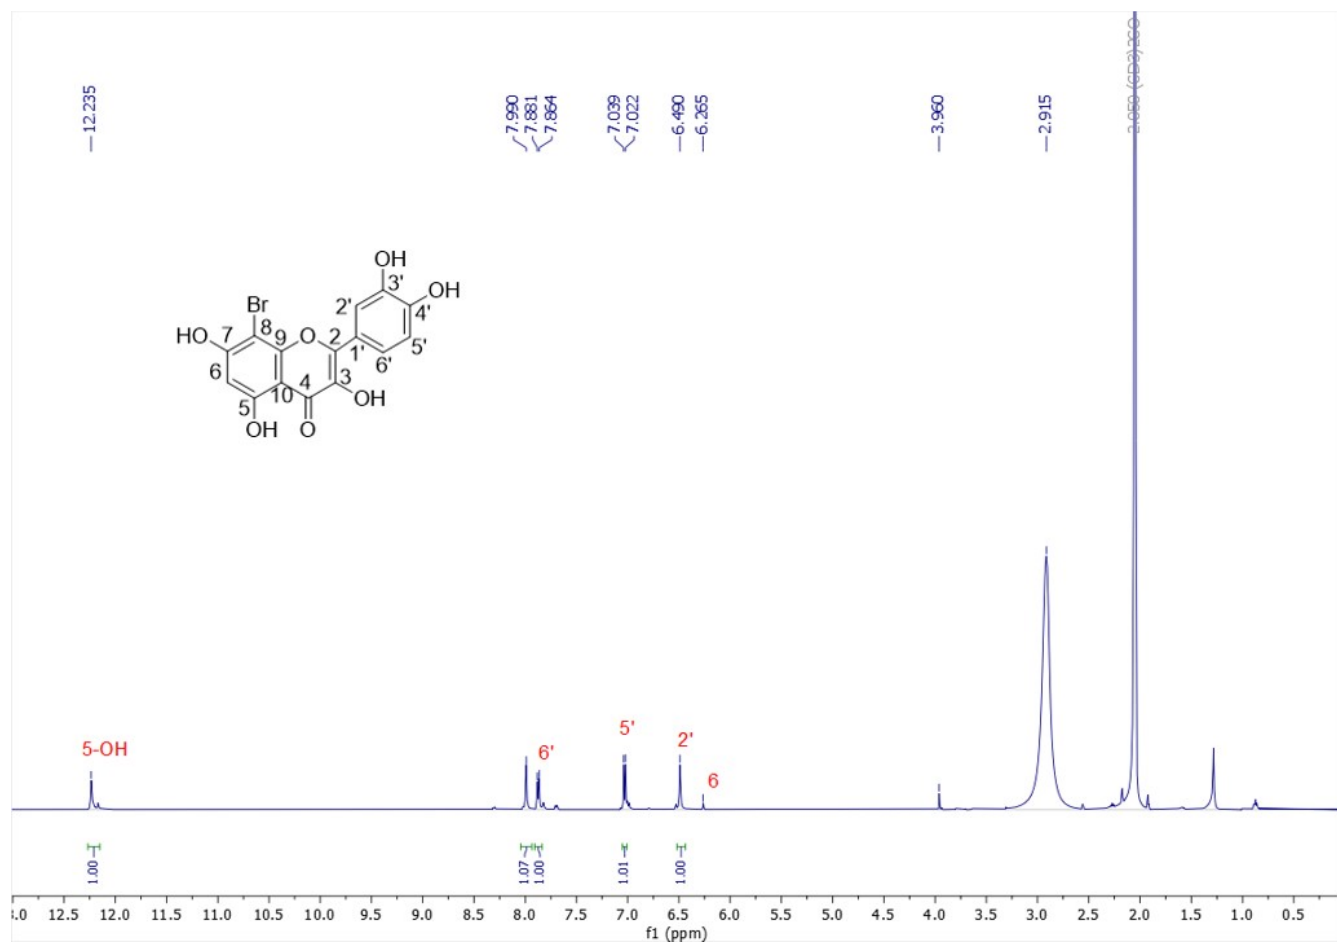

**Figure S17.**  $^1\text{H}$  NMR spectrum ( $\text{acetone-}d_6$ ) of **5a**

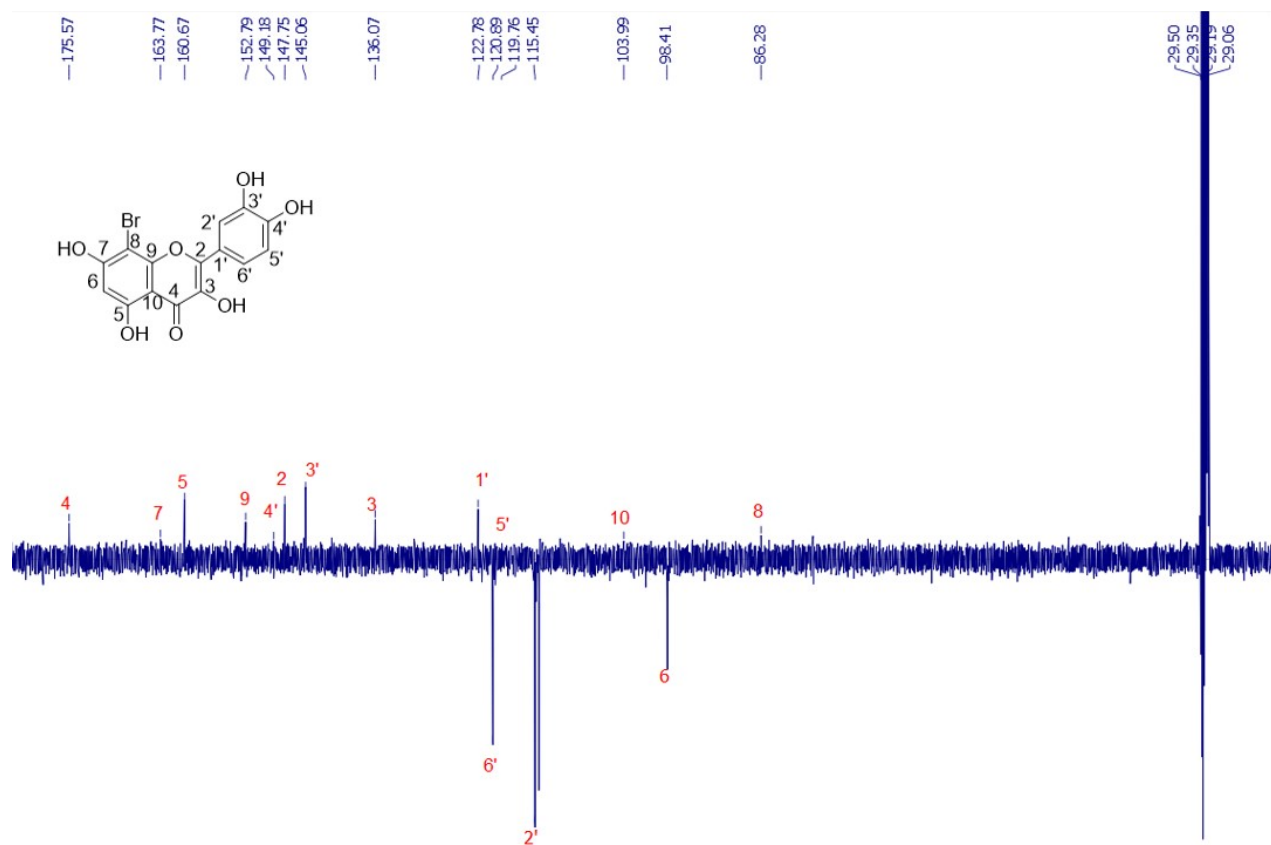

Figure S18.  $^{13}\text{C}$  NMR spectrum (acetone- $d_6$ ) of **5a**

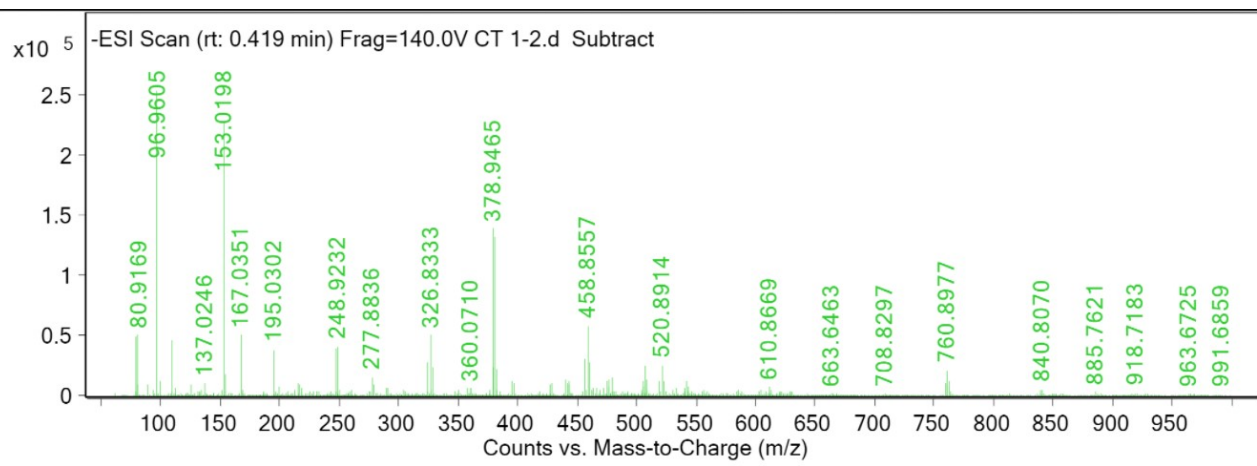

**Figure S19.** HRESIMS spectrum of **5a**

**Table S1. Physicochemical properties of compound 5a**

| <b>Property</b>  | <b>Value</b> | <b>Comment</b>                                                  |
|------------------|--------------|-----------------------------------------------------------------|
| Molecular Weight | 379.95       | Contain hydrogen atoms. Optimal:100-600                         |
| Volume           | 302.05       | Van der Waals volume                                            |
| nHA              | 7            | Number of hydrogen bond acceptors.<br>Optimal:0-12              |
| nHD              | 5            | Number of hydrogen bond donors.<br>Optimal:0-7                  |
| nRot             | 1            | Number of rotatable bonds. Optimal:0-11                         |
| MaxRing          | 10           | Number of atoms in the biggest ring.<br>Optimal:0-18            |
| nHet             | 8            | Number of heteroatoms. Optimal:1-15                             |
| fChar            | 0            | Formal charge. Optimal:-4~4                                     |
| nRig             | 18           | Number of rigid bonds. Optimal:0-30                             |
| Flexibility      | 0.056        | Flexibility =nRot /nRig                                         |
| Stereo Centers   | 0            | Optimal: $\leq 2$                                               |
| TPSA             | 131.36       | Topological Polar Surface Area. Optimal: 0-140                  |
| logS             | -4.064       | Log of the aqueous solubility. Optimal: -4-0.5 log mol/L        |
| logP             | 3.173        | Log of the octanol/water partition coefficient.<br>Optimal: 0-3 |
| logD             | 1.851        | logP at physiological pH 7.4. Optimal: 1-3                      |

**Table. S2. Medicinal Chemistry of compound 5a**

| Property         | Value    | Comment                                                                                                                                                                           |
|------------------|----------|-----------------------------------------------------------------------------------------------------------------------------------------------------------------------------------|
| QED              | 0.41     | A measure of drug-likeness based on the concept of desirability; n Attractive: > 0.67; unattractive: 0.49~0.67; toocomplex: < 0.34                                                |
| SAscore          | 2.845    | Synthetic accessibility score is designed to estimate ease of synthesis of drug-like molecules. SAscore $\geq$ 6, difficult to synthesize; SAscore <6, easy to synthesize.        |
| Fsp <sup>3</sup> | 0.0      | The number of sp <sup>3</sup> hybridized carbons / total carbon count, correlating with melting point and solubility. Fsp <sup>3</sup> $\geq$ 0.42 is considered a suitable value |
| MCE-18           | 20.0     | MCE-18 stands for medicinal chemistry evolution. MCE-18 $\geq$ 45 is considered a suitable value.                                                                                 |
| NPscore          | 1.589    | Natural product-likeness score. This score is typically in the range from -5 to 5. The higher the score is, the higher the probability is that the molecule is a NP               |
| Lipinski Rule    | Accepted | MW $\leq$ 500; logP $\leq$ 5; Hacc $\leq$ 10; Hdon $\leq$ 5. If two properties are out of range, a poor absorption or permeability is possible, one is acceptable.                |
| Pfizer Rule      | Accepted | logP > 3; TPSA < 75; Compounds with a high log P (>3) and low TPSA (<75) are likely to be toxic.                                                                                  |
| GSK Rule         | Accepted | MW $\leq$ 400; logP $\leq$ 4; Compounds satisfying the GSK rule may have a more favorable ADMET profile                                                                           |
| Golden           | Accepted | 200 $\leq$ MW $\leq$ 500; -2 $\leq$ logD $\leq$ 5; Compounds                                                                                                                      |

| <b>Property</b>  | <b>Value</b> | <b>Comment</b>                                                                                       |
|------------------|--------------|------------------------------------------------------------------------------------------------------|
| Triangle         |              | satisfying the Golden Triangle rule may have a more favorable ADMET profile                          |
| PAINS            | 1 alert      | Pan Assay Interference Compounds, frequent hitters,<br>Alpha-screen artifacts and reactive compound. |
| ALARM<br>NMR     | 4 alerts     | Thiol reactive compounds                                                                             |
| BMS              | 1 alert      | Undesirable, reactive compounds                                                                      |
| Chelator<br>Rule | 2 alerts     | Chelating compounds                                                                                  |

**Table S3. The Absorption of compound 5a**

| <b>Property</b>        | <b>Value</b> | <b>Comment</b>                                                                                                                                                                    |
|------------------------|--------------|-----------------------------------------------------------------------------------------------------------------------------------------------------------------------------------|
| Caco-2<br>Permeability | -5.209       | Optimal: higher than -5.15 Log unit                                                                                                                                               |
| MDCK<br>Permeability   | 1.2e-05      | low permeability: $< 2 \times 10^{-6}$ cm/s<br>medium permeability: $2-20 \times 10^{-6}$ cm/s<br>high passive permeability: $> 20 \times 10^{-6}$ cm/s                           |
| Pgp-inhibitor          | 0.113        | Category 1: Inhibitor; Category 0: Non-inhibitor;<br>The output value is the probability of being<br>Pgp-inhibitor                                                                |
| Pgp-substrate          | 0.0          | Category 1: substrate; Category 0: Non-substrate;<br>The output value is the probability of being<br>Pgp-substrate                                                                |
| HIA                    | 0.152        | Human Intestinal Absorption; Category 1: HIA+<br>(HIA $< 30\%$ ); Category 0: HIA-(HIA $< 30\%$ ); The<br>output value is the probability of being HIA+                           |
| F <sub>20%</sub>       | 0.012        | 20% Bioavailability; Category 1: F20%+<br>(bioavailability $< 20\%$ ); Category 0: F20%-<br>(bioavailability $\geq 20\%$ ); The output value is the<br>probability of being F20%+ |
| F30%                   | 0.589        | 30% Bioavailability; Category 1: F30%+<br>(bioavailability $< 30\%$ ); Category 0: F30%-<br>(bioavailability $\geq 30\%$ ); The output value is the<br>probability of being F30%+ |



**Table S4. The properties of the drug distribution of compound 5a**

| <b>Property</b> | <b>Value</b> | <b>Comment</b>                                                                                                         |
|-----------------|--------------|------------------------------------------------------------------------------------------------------------------------|
| PPB             | 99.32%       | Plasma Protein Binding; Optimal: < 90%. Drugs with high protein-bound may have a low therapeutic index.                |
| VD              | 0.554        | Volume Distribution; Optimal: 0.04-20 L/kg                                                                             |
| BBB Penetration | 0.006        | Blood-Brain Barrier Penetration; Category 1: BBB+; Category 0: BBB-; The output value is the probability of being BBB+ |
| Fu              | 2.107%       | The fraction unbound in plasms; Low: <5%; Middle: 5~20%; High: > 20%                                                   |

**Table S5. The properties of the drug metabolism of compound 5a**

| <b>Property</b>   | <b>Value</b> | <b>Comment</b>                                                                                            |
|-------------------|--------------|-----------------------------------------------------------------------------------------------------------|
| CYP1A2 inhibitor  | 0.937        | Category 1: Inhibitor; Category 0: Non-inhibitor; The output value is the probability of being inhibitor  |
| CYP1A2 substrate  | 0.11         | Category 1: Substrate; Category 0: Non-substrate; The output value is the probability of being substrate  |
| CYP2C19 inhibitor | 0.105        | Category 1: Inhibitor; Category 0: Non-inhibitor; The output value is the probability of being inhibitor  |
| CYP2C19 Substrate | 0.041        | Category 1: Substrate; Category 0: Non-substrate; The output value is the probability of being substrate  |
| CYP2C9 inhibitor  | 0.041        | Category 1: Inhibitor; Category 0: Non-inhibitor; The output value is the probability of being inhibitor. |
| CYP2C9 substrate  | 0.318        | Category 1: Substrate; Category 0: Non-substrate; The output value is the probability of being substrate. |
| CYP2D6 inhibitor  | 0.138        | Category 1: Inhibitor; Category 0: Non-inhibitor; the output value is the probability of being inhibitor. |
| CYP2D6 Substrate  | 0.167        | Category 1: Substrate; Category 0: Non-substrate; The output value is the probability of being substrate  |
| CYP3A4 inhibitor  | 0.143        | Category 1: Inhibitor; Category 0: Non-inhibitor; The output value is the probability of being inhibitor  |
| CYP3A4 Substrate  | 0.042        | Category 1: Substrate; Category 0: Non-substrate; The output value is the probability of being substrate  |

**Table S6. The properties of the drug excretion of compound 5a**

| <b>Property</b> | <b>Value</b> | <b>Comment</b>                                                                                                                                                     |
|-----------------|--------------|--------------------------------------------------------------------------------------------------------------------------------------------------------------------|
| CL              | 5.759        | Clearance; High: >15 mL/min/kg; moderate: 5-15 mL/min/kg; low: <5 mL/min/kg                                                                                        |
| T1/2            | 0.915        | Category 1: long half-life; Category 0: short; half-life; long half-life: >3h; short half-life: <3h; The output value is the probability of having long half-life. |

**Table S7. The properties of the drug toxicity of compound 5a**

| <b>Property</b>         | <b>Value</b> | <b>Comment</b>                                                                                                                                                     |
|-------------------------|--------------|--------------------------------------------------------------------------------------------------------------------------------------------------------------------|
| hERG Blockers           | 0.022        | Category 1: active; Category 0: inactive; The output value is the probability                                                                                      |
| H-HT                    | 0.153        | Human Hepatotoxicity; Category 1: H-HT positive(+); Category 0: H-HT negative(-); The output value is the probability of                                           |
| DILI                    | 0.988        | Drug Induced Liver Injury; Category 1: drugs with a high risk of DILI; Category 0: drugs with no risk of DILI. The output value is the probability of being toxic. |
| AMES Toxicity           | 0.814        | Category 1: Ames positive(+); Category 0: Ames negative(-); The output value is the probability of being toxic                                                     |
| Rat Oral Acute Toxicity | 0.123        | Category 0: low-toxicity; Category 1: high-toxicity; The output value is the probability of being highly toxic                                                     |
| FDAMDD                  | 0.089        | Maximum Recommended Daily Dose; Category 1: FDAMDD (+); Category 0: FDAMDD (-); The output value is the probability of being positive.                             |
| Skin Sensitization      | 0.903        | Category 1: Sensitizer; Category 0: Non-sensitizer; The output value is the probability of being sensitizer.                                                       |
| Carcinogenicity         | 0.106        | Category 1: carcinogens; Category 0: non-carcinogens; The output value is the probability of being toxic.                                                          |

---

|                      |       |                                                                                                                              |
|----------------------|-------|------------------------------------------------------------------------------------------------------------------------------|
| Eye corrosion        | 0.004 | Category 1: corrosives ; Category 0: noncorrosives; The output value is the probability of being corrosives                  |
| Eye irritation       | 0.923 | Category 1: irritants; Category 0: nonirritants;<br>The output value is the probability of being irritants.                  |
| Respiratory Toxicity | 0.079 | Category 1: respiratory toxicants; Category 0: respiratory nontoxicants; The output value is the probability of being toxic. |

---

**Table S8. The properties of the Environmental toxicity of compound 5a**

| <b>Property</b>          | <b>Value</b> | <b>Comment</b>                                                                                                                                                                                      |
|--------------------------|--------------|-----------------------------------------------------------------------------------------------------------------------------------------------------------------------------------------------------|
| Bioconcentration Factors | 1.09         | Bioconcentration factors are used for considering secondary poisoning potential and assessing risks to human health via the food chain. The unit is - $\log_{10}[(\text{mg/L})/(1000 * \text{MW})]$ |
| IGC <sub>50</sub>        | 4.206        | Tetrahymena pyriformis 50 percent growth inhibition concentration; The unit is - $\log_{10}[(\text{mg/L})/(1000 * \text{MW})]$ .                                                                    |
| LC <sub>50</sub> FM      | 5.575        | 96-hour fathead minnow 50 percent lethal concentration; The unit is - $\log_{10}[(\text{mg/L})/(1000 * \text{MW})]$ .                                                                               |
| LC <sup>50</sup> DM      | 5.463        | 48-hour daphnia magna 50 percent lethal concentration; The unit is - $\log_{10}[(\text{mg/L})/(1000 * \text{MW})]$ .                                                                                |

**Table S9. The properties of the Tox21 pathway of compound 5a**

| <b>Property</b> | <b>Value</b> | <b>Comment</b>                                                                                                                                      |
|-----------------|--------------|-----------------------------------------------------------------------------------------------------------------------------------------------------|
| NR-AR           | 0.012        | Androgen receptor; Category 1: actives ; Category 0: inactives; The output value is the probability of being active.                                |
| NR-AR-LBD       | 0.094        | Androgen receptor ligand-binding domain; Category 1: actives ; Category 0: inactives; The output value is the probability of being active.          |
| NR-AhR          | 0.956        | Aryl hydrocarbon receptor; Category 1: actives ; Category 0: inactives The output value is the probability of being active.                         |
| NR-Aromatase    | 0.875        | Category 1: actives; Category 0: inactives; The output value is the probability of being active.                                                    |
| NR-ER           | 0.818        | Estrogen receptor; Category 1: actives ; Category 0: inactives; The output value is the probability of being active.                                |
| NR-ER-LBD       | 0.886        | Estrogen receptor ligand-binding domain; Category 1: actives ; Category 0: inactives; The output value is the probability of being active.          |
| NR-PPARgamma    | 0.937        | Peroxisome proliferator-activated receptor gamma; Category 1: actives ; Category 0: inactives; The output value is the probability of being active. |
| SR-ARE          | 0.637        | Antioxidant response element; Category 1: actives ; Category 0: inactives; The output value is the probability of being                             |

|          |       |                                                                                                                                                  |
|----------|-------|--------------------------------------------------------------------------------------------------------------------------------------------------|
|          |       | active.                                                                                                                                          |
| SR-ATAD5 | 0.209 | ATPase family AAA domain-containing protein 5; Category 1: actives ; Category 0: inactives; The output value is the probability of being active. |
| SR-HSE   | 0.291 | Heat shock factor response element; Category 1: actives ; Category 0: inactives; The output value is the probability of being active.            |
| SR-MMP   | 0.917 | Mitochondrial membrane potential; Category 1: actives ; Category 0: inactives; The output value is the probability of being active.              |
| SR-p53   | 0.784 | Category 1: actives ; Category 0: inactives; The output value is the probability of being active.                                                |



**Table S10. Toxicophore rules of compound 5a**

| <b>Property</b>                   | <b>Value</b> | <b>Comment</b>                                                    |
|-----------------------------------|--------------|-------------------------------------------------------------------|
| Acute Toxicity Rule               | 0 alert      | 20 substructures; Acute toxicity during oral administration       |
| Genotoxic Carcinogenicity Rule    | 0 alert      | 117 substructures; Carcinogenicity or mutagenicity                |
| NonGenotoxic Carcinogenicity Rule | 8 alerts     | 23 substructures; Carcinogenicity through nongenotoxic mechanisms |
| Skin Sensitization Rule           | 8 alerts     | 155 substructures; Skin irritation                                |
| Aquatic Toxicity Rule             | 1 alert      | 99 substructures; Toxicity to liquid(water)                       |
| NonBiodegradable Rule             | 1 alert      | 19 substructures; Non-biodegradable;                              |
| SureChEMBL Rule                   | 0 alert      | 164 substructures; MedChem unfriendly status                      |
